1 **Title:** Algorithmic Learning for Auto-deconvolution of GC-MS Data to Enable Molecular  
2 Networking within GNPS.

3  
4 **Authors:** Alexander A. Aksenov<sup>1,2,#</sup>, Ivan Laponogov<sup>3,#</sup>, Zheng Zhang<sup>1</sup>, Sophie LF Doran<sup>3</sup>,  
5 Ilaria Belluomo<sup>3</sup>, Dennis Veselkov<sup>4</sup>, Wout Bittremieux<sup>1,2,35</sup>, Louis Felix Nothias<sup>1,2</sup>, Mélissa  
6 Nothias-Esposito<sup>1,2</sup>, Katherine N. Maloney<sup>1,27</sup>, Biswapriya B. Misra<sup>5</sup>, Alexey V. Melnik<sup>1</sup>,  
7 Kenneth L. Jones II<sup>1</sup>, Kathleen Dorrestein<sup>1,2</sup>, Morgan Panitchpakdi<sup>1</sup>, Madeleine Ernst<sup>1,33</sup>,  
8 Justin J.J. van der Hoof<sup>1,38</sup>, Mabel Gonzalez<sup>6</sup>, Chiara Carazzone<sup>6</sup>, Adolfo Amézquita<sup>7</sup>, Chris  
9 Callewaert<sup>8,9</sup>, James Morton<sup>9</sup>, Robert Quinn<sup>10</sup>, Amina Bouslimani<sup>1,2</sup>, Andrea Albarracín  
10 Orio<sup>11</sup>, Daniel Petras<sup>1,2</sup>, Andrea M. Smania<sup>31,32</sup>, Sneha P. Couvillion<sup>12</sup>, Meagan C. Burnet<sup>12</sup>,  
11 Carrie D. Nicora<sup>12</sup>, Erika Zink<sup>12</sup>, Thomas O. Metz<sup>12</sup>, Viatcheslav Artaev<sup>13</sup>, Elizabeth Humston-  
12 Fulmer<sup>13</sup>, Rachel Gregor<sup>37</sup>, Michael M. Meijler<sup>37</sup>, Itzhak Mizrahi<sup>36</sup>, Stav Eyal<sup>36</sup>, Brooke  
13 Anderson<sup>15</sup>, Rachel Dutton<sup>15</sup>, Raphaël Luga<sup>16</sup>, Pauline Le Boulch<sup>16</sup>, Yann Guitton<sup>17</sup>,  
14 Stephanie Prevost<sup>17</sup>, Audrey Poirier<sup>17</sup>, Gaud Dervilly<sup>17</sup>, Bruno Le Bizec<sup>17</sup>, Aaron Fait<sup>14</sup>, Noga  
15 Sikron Persi<sup>14</sup>, Chao Song<sup>14</sup>, Kelem Gashu<sup>14</sup>, Roxana Coras<sup>18</sup>, Monica Guma<sup>18</sup>, Julia  
16 Manasson<sup>21</sup>, Jose U. Scher<sup>21</sup>, Dinesh Barupal<sup>19</sup>, Saleh Alseekh<sup>20,29</sup>, Alisdair Fernie<sup>20,29</sup>, Reza  
17 Mirnezami<sup>28</sup>, Vasilis Vasiliou<sup>22</sup>, Robin Schmid<sup>23</sup>, Roman S. Borisov<sup>24</sup>, Larisa N. Kulikova<sup>25</sup>,  
18 Rob Knight<sup>9,26,34,35</sup>, Mingxun Wang<sup>1,2</sup>, George B Hanna<sup>3</sup>, Pieter C. Dorrestein<sup>1,2,9,26,\*</sup> & Kirill  
19 Veselkov<sup>3\*\*</sup>.

20  
21 **Addresses:**

- 22 1. Skaggs of Pharmacy and Pharmaceutical Sciences, University of California San  
23 Diego, La Jolla, San Diego, CA
- 24 2. Collaborative Mass Spectrometry Innovation Center, Skaggs School of Pharmacy and  
25 Pharmaceutical Sciences, University of San Diego, California, 9500 Gilman Dr. La  
26 Jolla CA 92093
- 27 3. Department of Surgery and Cancer, Imperial College London, South Kensington  
28 Campus, London SW7 2AZ
- 29 4. Intelligify Limited, 160 Kemp House, City Road, London, United Kingdom, EC1V 2NX
- 30 5. Center for Precision Medicine, Department of Internal Medicine, Section of Molecular  
31 Medicine, Wake Forest School of Medicine, Medical Center Boulevard, Winston-  
32 Salem NC 27157
- 33 6. Department of Chemistry, Universidad de los Andes, Bogotá, Colombia
- 34 7. Department of Biological Sciences, Universidad de los Andes, Bogotá, Colombia
- 35 8. Center for Microbial Ecology and Technology, Coupure Links 653, 9000 Ghent,  
36 Belgium
- 37 9. Department of Pediatrics, University of California, San Diego, La Jolla, CA, USA
- 38 10. Department of Biochemistry and Molecular Biology, Michigan State University, 603  
39 Wilson Rd, East Lansing, MI 48824
- 40 11. IRNASUS, Universidad Católica de Córdoba, CONICET, Facultad de Ciencias  
41 Agropecuarias. Córdoba, Argentina
- 42 12. Biological Sciences Division, Pacific Northwest National Laboratory, Richland, WA  
43 99352
- 44 13. LECO Corporation, 3000 Lakeview Avenue, St. Joseph, MI 49085

- 45 14. The French Associates Institute for Agriculture and Biotechnology of Dryland, The  
46 Jacob Blaustein Institutes for Desert Research, Ben Gurion University of the Negev,  
47 84990 Sede Boqer Campus, Israel
- 48 15. Division of Biological Sciences, University of San Diego, California, 9500 Gilman Dr.  
49 La Jolla CA 92093
- 50 16. UMR Qualisud, Université d'Avignon et des Pays du Vaucluse, Agrosiences, 84000  
51 Avignon, France
- 52 17. Laboratoire d'Etude des Résidus et Contaminants dans les Aliments (LABERCA),  
53 Oniris, INRA, 44307 Nantes, France
- 54 18. Division of Rheumatology, Department of Medicine, University of California San  
55 Diego, La Jolla, CA
- 56 19. NIH West-Coast Metabolomics Center for Compound Identification, University of  
57 California Davis, Davis CA USA
- 58 20. Max-Planck Institute for Molecular Plant Physiology, 14476, Potsdam-Golm, Germany
- 59 21. Division of Rheumatology, Department of Medicine, New York University School of  
60 Medicine, New York, NY
- 61 22. Department of Environmental Health Sciences, Yale School of Public Health, Yale  
62 University, New Haven, CT, USA
- 63 23. Institute of Inorganic and Analytical Chemistry, Corrensstr. 28/30, 48149 Münster,  
64 Germany
- 65 24. A.V.Topchiev Institute of Petrochemical Synthesis RAS, 29 Leninsky pr., Moscow,  
66 119991 Russian Federation
- 67 25. Peoples' Friendship University of Russia (RUDN University), 6 Miklukho-Maklaya St,  
68 Moscow, 117198 Russian Federation
- 69 26. UCSD center for Microbiome Innovation, University of San Diego, California, 9500  
70 Gilman Dr. La Jolla CA 92093
- 71 27. Department of Chemistry, Point Loma Nazarene University, 3900 Lomaland Drive,  
72 San Diego, CA, 92106 USA
- 73 28. Department of Colorectal Surgery, Royal Free Hospital NHS Foundation Trust, Pond  
74 Street, Hampstead, London NW3 2QG
- 75 29. Center of Plant Systems Biology and Biotechnology (CPSBB), Plovdiv, Bulgaria
- 76 30. University of Antwerp, Antwerp, Belgium
- 77 31. Universidad Nacional de Córdoba, Facultad de Ciencias Químicas, Departamento de  
78 Química Biológica Ranwel Caputto, Córdoba, Argentina.
- 79 32. CONICET, Universidad Nacional de Córdoba, Centro de Investigaciones en Química  
80 Biológica de Córdoba (CIQUIBIC), Córdoba, Argentina.
- 81 33. Center for Newborn Screening, Department of Congenital Disorders, Statens Serum  
82 Institut, Copenhagen, Denmark
- 83 34. Department of Bioengineering, University of California, San Diego, La Jolla, CA, USA
- 84 35. Department of Computer Science, University of California, San Diego, La Jolla, CA,  
85 USA
- 86 36. Department of Life Sciences and the National Institute for Biotechnology in the  
87 Negev, Ben-Gurion University of the Negev, Beer-Sheva, Israel

88 37. Department of Chemistry and the National Institute for Biotechnology in the Negev,  
89 Ben-Gurion University of the Negev, Beer-Sheva, Israel

90 38. Bioinformatics Group, Wageningen University, Droevendaalsesteeg 1, 6708 PB,  
91 Wageningen, the Netherlands

92

93 # Co-first author

94 \* To whom correspondence should be addressed regarding mass spectrometry and  
95 GNPS – [pdorrestein@health.ucsd.edu](mailto:pdorrestein@health.ucsd.edu)

96 \*\* To whom correspondence should be addressed regarding MSHub.

97 [kirill.veselkov04@imperial.ac.uk](mailto:kirill.veselkov04@imperial.ac.uk)

98

### 99 **Author contributions:**

100 PCD, AAA, MW, LFN came up with the concept of GNPS for GC-MS data.

101 KV designed and supervised MSHub platform development

102 IL, DV, VV, KV developed the MSHub platform

103 MW, ZZ, AAA developed the workflows

104 AAA, ZZ, MW, BBM, RSB performed infrastructure testing and benchmarking

105 AAA, ZZ assessed EI-based molecular networking

106 WB generated plots for MSHub algorithm performance testing

107 ZZ, AA, ME generated molecular network plots

108 ME, JJJvdH adapted the MolNetEnhancer workflow for GC-MS Molecular Networks

109 AAA, AVM, MP, KJ, KD conducted 3D skin volatilome mapping studies

110 SD, IB, GH conducted oesophageal and gastric breath analysis cancers detection study

111 AAA, ZZ, MP, MW converted and added public libraries to GNPS

112 AAA, AVM, SD, BBM, MG, CC, AA, JM, RQ, AB, AAO, DP, AMS, SPC, TOM, MCB, CDN,

113 EZ, VA, EHF, RG, MMM, IM, SE, PLB, BA, RL, YG, SP, AP, GD, BLB, AF, NS, KG, CS, RC,

114 MG, JM, JUS, DB, SA, AF generated GC-MS data

115 RSB, LNK, AAA assembled the initial version of the public reference spectra library

116 RS created MZmine export module for GNPS GC-MS input files and RI markers file export

117 AAA, RS, IB, AAO, AMS, BA, MG, KNM, RSB produced training videos

118 AAA, MNE, MG, LFN wrote and compiled tutorials and documentation

119 PCD, AAA, WB, KV, RM, RK wrote the paper

120

### 121 **Ethics/COI declaration**

122 Pieter C. Dorrestein is a scientific advisor for Sirenas LLC.

123 Mingxun Wang is a consultant for Sirenas LLC and the founder of Ometa labs LLC.

124 Alexander A. Aksenov is a consultant for Ometa labs LLC.

125

126 **Online Tutorial:** <https://ccms-ucsd.github.io/GNPSDocumentation/gcanalysis/>

127

128 **Abstract:** Gas chromatography-mass spectrometry (GC-MS) represents an analytical  
129 technique with significant practical societal impact. Spectral deconvolution is an essential  
130 step for interpreting GC-MS data. No public GC-MS repositories that also enable repository-  
131 scale analysis exist, in part because deconvolution requires significant user input. We

132 therefore engineered a scalable machine learning workflow for the Global Natural Product  
133 Social Molecular Networking (GNPS) analysis platform to enable the mass spectrometry  
134 community to store, process, share, annotate, compare, and perform molecular networking of  
135 GC-MS data. The workflow performs auto-deconvolution of compound fragmentation patterns  
136 *via* unsupervised non-negative matrix factorization, using a Fast Fourier Transform-based  
137 strategy to overcome scalability limitations. We introduce a “balance score” that quantifies the  
138 reproducibility of fragmentation patterns across all samples. We demonstrate the utility of the  
139 platform with breathomics analysis applied to the early detection of oesophago-gastric  
140 cancer, and by creating the first molecular spatial map of the human volatilome.

141  
142

### 143 **Introduction:**

144 Electron ionization gas chromatography-mass spectrometry (GC-MS) is widely used  
145 in numerous analytical applications with profound societal impact, including screening for  
146 inborn errors of metabolism, toxicological profiling in humans and animals, basic science  
147 investigations into biochemical pathways and metabolic flux, understanding of  
148 chemoattraction, doping investigations, forensics, food science, chemical ecology, ocean and  
149 air quality monitoring, and many routine laboratory tests including cholesterol<sup>1</sup>, vitamin D<sup>2</sup>  
150 and lipid levels<sup>3</sup>. GC-MS is widely adopted because of its key advantages, including low  
151 operational cost, excellent chromatographic resolution, reproducibility and ease of use.

152 In GC-MS, the predominant ionization technique is electron ionization (EI), in which all  
153 compounds that elute from the chromatography column are ionized by high energy (70eV)  
154 electrons in a highly reproducible fashion to yield a combination of fragment ions. Because  
155 fragmentation occurs simultaneously with ionization, an essential computational step in the  
156 analysis of all GC-MS data is the “spectral deconvolution” - the process of separating  
157 fragmentation ion patterns for each eluting molecule into a composite mass spectrum<sup>4</sup>. The  
158 deconvolution is particularly computationally challenging for complex biological systems  
159 where co-elution of compounds is inevitable as raw GC-MS data consist of mass spectra  
160 originating from hundreds-to-thousands of molecules.

161 Annotation of GC-MS data is achieved by matching the deconvoluted fragmentation  
162 spectra against reference spectral libraries of known molecules. The 70eV energy for ionizing  
163 electrons in GC-MS was set as the standard early, making it possible to use decades-old EI  
164 reference spectra for annotation<sup>5,6</sup> and compare EI data across instruments. There are now  
165 ~1.2 million reference spectra, accumulated and curated over a period of >50 years, that are  
166 commercially or publicly available for the annotation of GC-MS data<sup>6,7</sup>. To date, many  
167 analytical tools and several repositories for GC-MS data have been introduced<sup>5,8-16</sup>. Despite  
168 these developments, much GC-MS data processing is restricted to vendor-specific formats  
169 and software (e.g. VocBinBase<sup>15</sup> uses Leco ChromaTOF data). Moreover, the deconvolution  
170 requires multiple parameters to be set by the user or manual peak integration. Further, none  
171 of the tools are integrated into a mass spectrometry/metabolomics public data repository that  
172 retains every setting and result of an analysis job, features that are vital for reproducibility of  
173 data processing. A public informatics resource that can not only be integrated with a public  
174 repository, but also perform GC-MS deconvolution, alignment, and mass spectral library  
175 matching for large numbers (>100) of data files is needed. Technical reasons, such as the  
176 lack of a shared and uniform data format, often preclude GC-MS data comparison between

177 different laboratories and prevents taking advantage of repository-scale information and  
178 community knowledge about the data. This, coupled to a lack of incentive to deposit data into  
179 public domain, leads to GC-MS datasets being infrequently shared and rarely reused across  
180 studies and/or biological systems<sup>15,17–21</sup>.

181 One of the developments that enabled finding additional structural relationships within  
182 mass spectrometry data is spectral alignment, which forms the basis for molecular  
183 networking<sup>22–26</sup>. Here, we develop a repository-scale analysis infrastructure for GC-MS data  
184 enable to create networks within the Global Natural Products Social (GNPS) Networking  
185 platform. GNPS promotes Findable, Accessible, Interoperable, and Reusable (FAIR) use  
186 practices for mass spectrometry data<sup>27</sup>. The community infrastructure can be accessed at  
187 <https://gnps.ucsd.edu> under the header “GC-MS EI Data Analysis”.

188

189 **Results: Creating a web-based scalable strategy for spectral deconvolution.** Current EI  
190 spectral deconvolution strategies can save settings and apply them to the next analysis, but  
191 require initial manual parameter setting (e.g. AMDIS<sup>5</sup>, MZmine/ADAP<sup>8</sup>, MS-DIAL<sup>9</sup>,  
192 PARAFAC2<sup>12</sup>); some require extensive computational skills to run (e.g. XCMS<sup>28</sup>, eRah<sup>14</sup>).  
193 Although batch modes exist, they do not enhance deconvolution quality by utilizing  
194 information from other files of the dataset. To use this across-file information, improve  
195 scalability of spectral deconvolution, and eliminate manual parameter setting, we developed  
196 an algorithmic learning strategy for deconvolution of entire datasets (**Figure 1a-f**). We  
197 deployed this functionality within GNPS/MassIVE<sup>29</sup> (**Figure 1f-i**). To promote analysis  
198 reproducibility, all GNPS jobs performed are retained in the “My User” space and can be  
199 shared as hyperlinks in collaborations or publications.

200 Classically, when performing spectral deconvolution of GC-MS data, the user defines  
201 parameters specific to their data to the best of their abilities. The user must therefore have a  
202 thorough understanding of the characteristics (i.e., peak shape, peak width, resolution etc.) of  
203 the particular GC-MS data set before spectral deconvolution. In our approach, the  
204 parameters for spectral deconvolution ( $m/z$  drift of the ions, peak shape - slopes of raising  
205 and trailing edges, peak shifts, and noise/intensity threshold) are auto-estimated. This user-  
206 independent ‘automatic’ parameter optimization is accomplished via fast Fourier  
207 transformation, multiplication, and inverse Fourier transformation for each ion across entire  
208 data sets, followed by an unsupervised matrix factorization (one layer neural network):

209 **Figure 1a-e**. Then, the compositional consistency of spectral patterns, for each spectral  
210 feature deconvoluted across the entire data set, can be summarized as a parameter that we  
211 termed “balance score”. The balance score (definition is described in the Methods) gives  
212 insight into how well the spectral feature is explained across the entire data set: when high,  
213 the spectrum is consistent across different samples. Even when a compound is present in  
214 only a few samples in the dataset, as long as the spectral patterns are highly conserved  
215 across samples (e.g. not contaminated by spurious noise peaks), it would result in a high  
216 balance score. Balance score thus allows discarding low-quality spectra that are more likely  
217 to be noise, and provides an orthogonal metric to matching scores when searching spectral  
218 libraries. We refer to the dataset-based spectral deconvolution tool within the GNPS  
219 environment as “MSHub”. MSHub converts raw GC-MS data of any kind (e.g. **Table S1**) into  
220 spectral patterns, enabling molecular networking within GNPS.



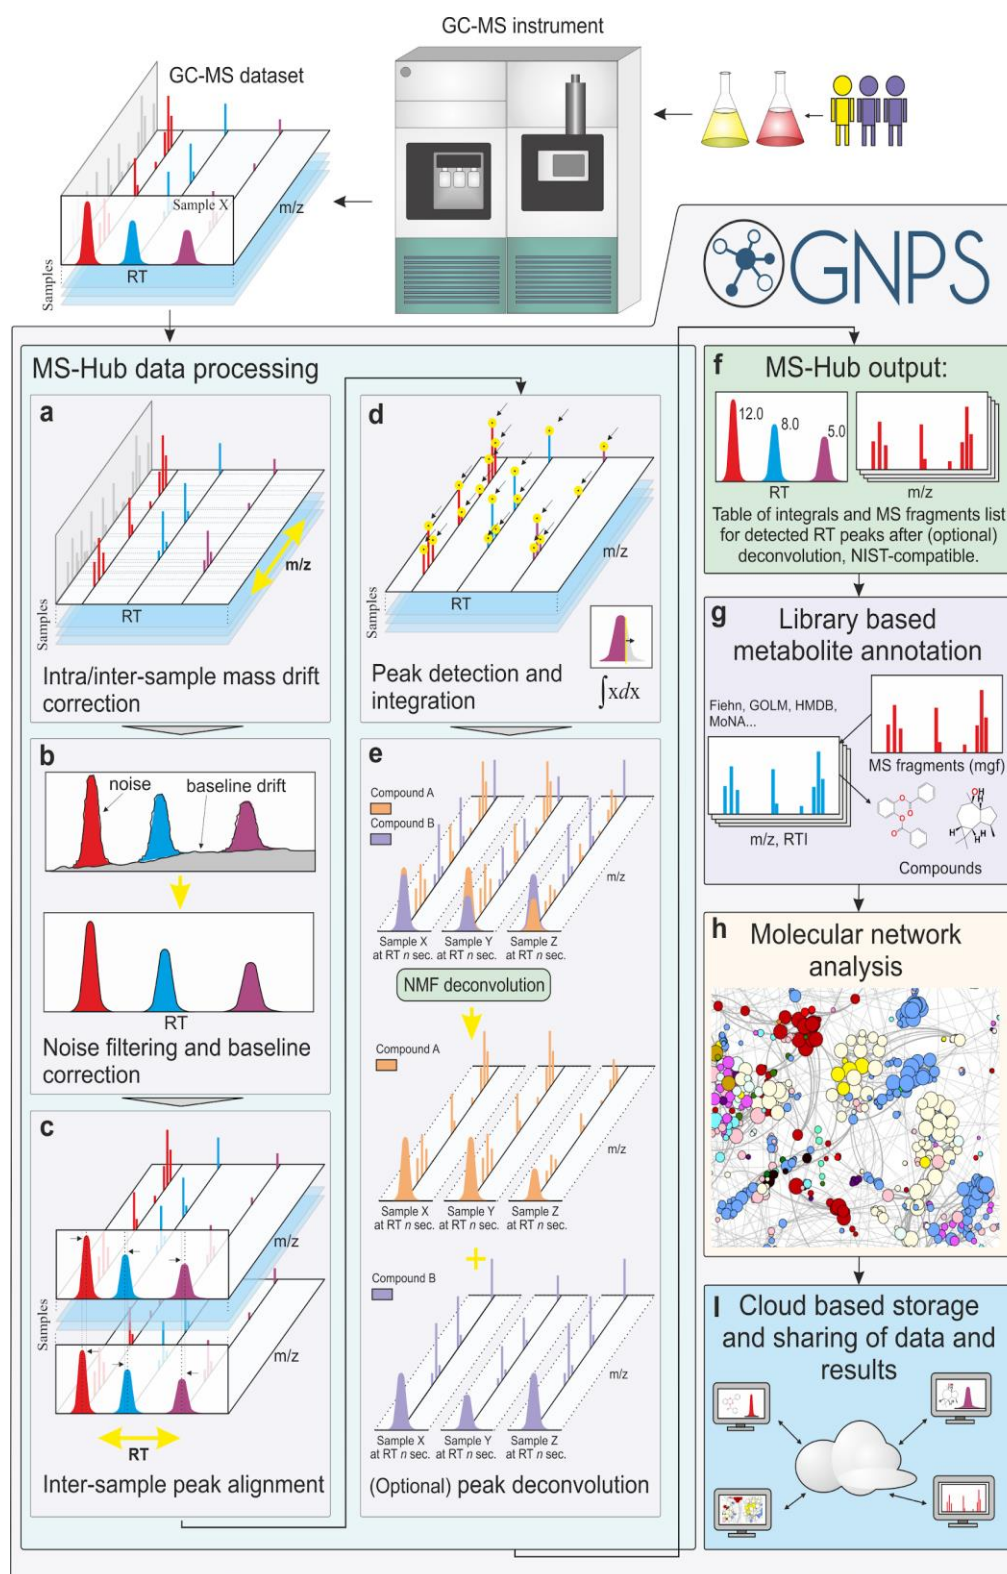

221  
222  
223  
224  
225

**Figure 1. Schematic representation of the MSHub processing pipeline within GNPS.** MSHub accepts netCDF, mzML formats of any EI GC-MS data for input. **a**) Spectra are aligned and binned in *m/z* dimension noise is filtered and **b**) baseline is corrected in each spectrum in RT dimension to address

226 issues such as baseline rise with thermal gradient due to bleeds. **c)** Common profile established across  
227 entire dataset and peaks in RT dimension are aligned to it using FFT-accelerated correlation in full  
228 resolution via iterative approach. **d)** Fast peak detection picks and integrates peaks to generate both  
229 peak integrals for all samples and their common fragmentation patterns. For datasets with more than 5  
230 samples peak deconvolution step **e)** is employed to separate overlapping peaks with different patterns  
231 across samples using NMF approach. **f)** MSHub produces peak integrals for all samples and canonical  
232 fragmentation patterns. **g)** GNPS employs either public or user-provided reference libraries to annotate  
233 peaks. **h)** Molecular networks are built for further metabolite analysis. **i)** Data and results are shared  
234 between users via GNPS's cloud architecture. NMF - Non-negative matrix factorization, FFT - Fast  
235 Fourier Transform, RT - retention time,  $m/z$  - mass-to-charge ratio.

236

237 All MSHub algorithms operate iteratively for enhanced scalability, using high-  
238 performance HDF5 technologies saving settings for each analysis step. The Fourier  
239 transform step with multiplication dramatically improves MSHub's efficiency, resulting in  
240 deconvolution times that scale linearly rather than exponentially with the number of files  
241 (**Figure 2a, S2**). The GNPS GC-MS workflow can process thousands of files in hours (**Figure**  
242 **2a**), which is faster than data acquisition, making data processing no longer a bottleneck. We  
243 achieved this performance using out-of-core processing, a technique used to process data  
244 that are too large to fit in a computer's main memory (RAM): MSHub uploads files one at a  
245 time into the specific RAM module, data are then processed and deleted from memory,  
246 iteratively. **Figure 2a** illustrates the linear dependency between the number of samples  
247 processed and the processing time. Because only one sample is stored in memory at any  
248 given time, the workflow memory load is constant. Spectral deconvolution scales linearly  
249 because each step in the processing pipeline is linear with respect to time (**Figure S2a-f**),  
250 taking ~1 min per file (**Figure S1**). The machine learning approaches gain improved  
251 performance with increasing amounts of data, which means that increasing dataset size  
252 would boost learning each spectral pattern. Indeed, larger volume of analyzed data leads to  
253 better scores of spectral matches for the known compounds in derivatized blood serum  
254 samples that were spiked with 37 fatty acid methyl esters (FAMES) and 17 long-chain  
255 hydrocarbons (**Figure 2b, c**). Cosine and balance score can be jointly used as filters for  
256 processing the final results (**Figure 2d-f**). In the analysis of biological samples, similar trends  
257 are found as for the reference dataset: the spectral matching scores against the library  
258 increase with increasing number of processed files while their distributions become narrower,  
259 a reflection that more data leads to better quality of results (**Figure 2g, h**). When there are  
260 more files deconvoluted, MSHub is leveraged to reduce chimeric spectra and discover more  
261 real spectral features, which leads to higher quality spectra and a rise in the number of  
262 unique annotations with greater match scores (**Figure 2i, j**). If the user only has a few files  
263 (fewer than 10), spectral deconvolution and alignment should be performed using alternative  
264 methods (e.g. MZmine<sup>30</sup>, OpenChrom<sup>28,31</sup>, AMDIS<sup>5</sup>, MZmine/ADAP<sup>8</sup>, MS-DIA<sup>9</sup>, BinBase<sup>15</sup>,  
265 XCMS<sup>32</sup>/XCMS Online<sup>28</sup>, MetAlign<sup>10</sup>, SpecAlign<sup>33</sup>, SpectConnect<sup>11</sup>, PARAFAC<sup>12</sup>, MeltDB<sup>13</sup>,  
266 eRah<sup>14</sup>). Using those tools, molecular networking can be performed in the same fashion as  
267 for MSHub, as the library search GNPS workflow accepts input from other tools into the  
268 GNPS/MassIVE environment. We have further benchmarked the MSHub against XCMS<sup>28</sup>  
269 (MassIVE dataset MSV000084622) and the quantitative results were nearly identical (the  
270 calibration curve was within 99.17% correlation with 0.72% STD, **Figure 2k,l**).

271 Spectral deconvolution using MSHub in GNPS generates an .mgf file that contains  
 272 deconvoluted spectra with aligned retention times and a feature table of peak areas of  
 273 features across all files. This generated .mgf spectral deconvolution summary file is used for  
 274 searching against spectral libraries and for molecular networking. GNPS saves this  
 275 information, so the deconvolution step does not need to be re-performed for any future  
 276 analyses. The output results can be downloaded and explored using many external tools,  
 277 e.g. MetExpert<sup>34</sup>.  
 278

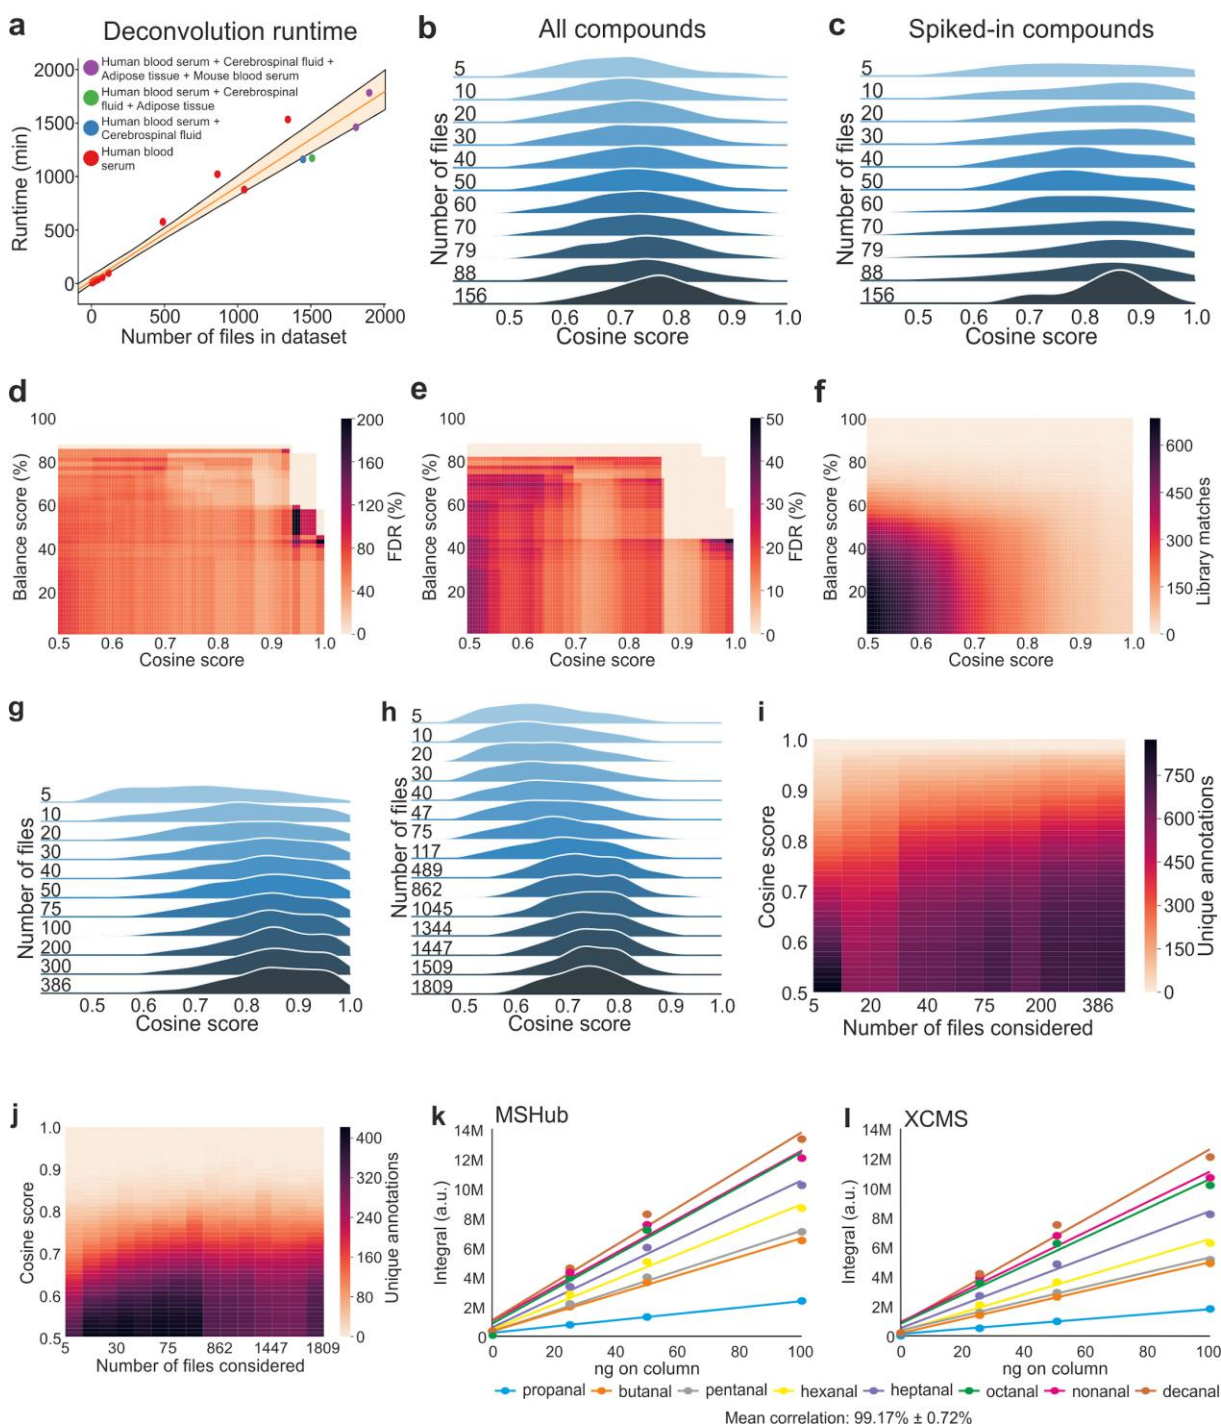

279



280 **Figure 2: Performance evaluation of dataset-wide deconvolution.** a) Linear dependence between  
281 the number of samples and the processing time on a single compute node. b) Distributions of library  
282 matching scores for the test dataset of reference compounds spiked in a complex blood serum matrix  
283 with an increased volume of input data (**datasets Test1-Test11, Table S1**) for all matches and c) for  
284 the reference compounds only. d) False discovery rate (FDR) for the sub-class<sup>35</sup> annotations (**dataset**  
285 **Test11 in Table S1**) of the top match and (e) top ten matches. More restrictive thresholds minimize  
286 misannotations. f) Heat map of the number of library matches for spiked compounds. g) Distributions  
287 of library matching scores for the top match in a study of oesophageal and gastric cancer detection  
288 using breath analysis (non-derivatized, **datasets ICL1-ICL11 in Table S1**) and h) studies of human  
289 and mouse blood serum, adipose tissue and cerebrospinal fluid (silalated, **datasets UCD1-UCD16 in**  
290 **Table S1**). i) Heat map of the number of unique annotations (top hit only) for the data across **datasets**  
291 **ICL1-ICL11 in Table S1** and j) **datasets UCD1-UCD16 in Table S1**; no balance score filtering  
292 applied. Spurious features corresponding to the low cosine tail of the distribution on panels (g) and (h)  
293 are improved as higher volume of the data enhances the frequency domain for deconvolution quality.  
294 k, l) Quantitative integrals of abundances quantitation for the mixture of standards (MassIVE dataset  
295 MSV000084622) evaluated using XCMS (l) and MSHub (k).

296  
297 **GNPS enables searches against public spectral reference libraries and molecular**  
298 **networking at repository scale.** Once the .mgf file is generated by GNPS-MSHub or  
299 imported from another deconvolution tool, the spectral features can be searched against  
300 public libraries<sup>36</sup> (currently GNPS has Fiehn<sup>37</sup>, HMDB<sup>38</sup>, MoNA<sup>17</sup>, VocBinBase<sup>15</sup>) or the user's  
301 own private or commercial libraries (such as NIST 2017<sup>39</sup> and Wiley). Matches are narrowed  
302 down based on user-defined filtering criteria such as number of matched ions, Kovats  
303 retention index (RI, calculated if hydrocarbon reference values are provided), balance score,  
304 cosine score, and abundance. With this release, we also provide additional freely available  
305 reference data compiled by co-authors of this manuscript of 19,808 spectra for 19,708  
306 standards. Although the possible candidate annotations can be further narrowed by retention  
307 index (RI), they should still be considered level 3, a molecular family, annotation according to  
308 the 2007 metabolomics standards initiative (MSI)<sup>40</sup>. Calculation of RIs is enabled and  
309 encouraged but not enforced. When multiple annotations can be assigned, GNPS provides  
310 all candidate matches within user's filtering criteria.

311 No matter how the spectral library is searched in GC-MS, due to the absence of a  
312 parent mass, a list of spectral matches is more likely contain mis-annotations, both related  
313 (isomers, isobars) or less frequent, entirely unrelated compounds<sup>5</sup>. However to spot  
314 misassignments at the molecular family level, we propose to explore deconvoluted GC-MS  
315 data via molecular networking, a strategy that has been effective for LC-MS/MS data. In the  
316 case of EI, unlike in LC-MS/MS where the precursor ion mass is known, the molecular ion is  
317 often absent. For this reason, the molecular networks are created through spectral similarity  
318 of the deconvoluted fragmentation spectrum without considering the molecular ion. For GC-  
319 MS data that do have a molecular ion or precursor ion mass, e.g. from chemical ionization  
320 (CI) or with MS/MS spectra, the feature-based molecular networking workflows should be  
321 used<sup>29,41</sup>. We explored clustering patterns for the EI data (**Figure S4**) and observed that the  
322 EI-based cosine similarity networks are predominantly driven by structural similarity (**Figure**  
323 **S4a**)<sup>35</sup>. These EI networks can be used to visualize chemical distributions and guide  
324 annotations (**Figure S5**). Networking enables data co- and re-analysis, as it is agnostic to the  
325 data origin once the features are deconvoluted. To demonstrate this, we have built a global

326 network of various public GC-MS datasets deposited on GNPS (38 datasets comprising  
327 ~8,500 GC-MS files, **Figure 3c**). These data encompass various types of samples, modes of  
328 sample introduction etc. and thus the global network is a snapshot of all chemistries  
329 detectable by GC-MS (**Figure 3c-e, S6**). Prior to networking, we applied a balance score of  
330 65%, which allowed us to remove a bulk of spurious low quality matches (**Figure 3 a,b**). The  
331 balance score filter ensures that the best-explained deconvoluted features are matched  
332 against the reference library. The annotation is usually done by ranking potential matches  
333 according to a similarity measure (forward match, reverse match, and probability<sup>42,43</sup>) and  
334 when possible, filtering by retention index then reporting the top match. Molecular networking  
335 can further guide the annotation at the family level by utilizing information from connected  
336 nodes (**Figure S5**) rather than focusing on individual annotations<sup>44</sup>. The global network can  
337 be colored by metadata such as sample type (**Figure 3c**), derivatized vs. non-derivatized,  
338 instrument type or other metadata (**Figure S6**) to reveal interpretable patterns. When coloring  
339 the data by sample type, for example, a cluster of nitrogen-containing heterocyclic  
340 compounds was observed to be unique to dart frogs from Dendrobatoidea superfamily  
341 (**Figure 3e**), while the long-chain ketones occur in cheese and beer (**Figure S7**). To highlight  
342 the broader utility of GNPS GC-MS and GC-MS based molecular networking, 6 supplemental  
343 videos were created that carry the user through how to navigate and perform analysis with  
344 the tools (**Supporting Videos 1-6**).

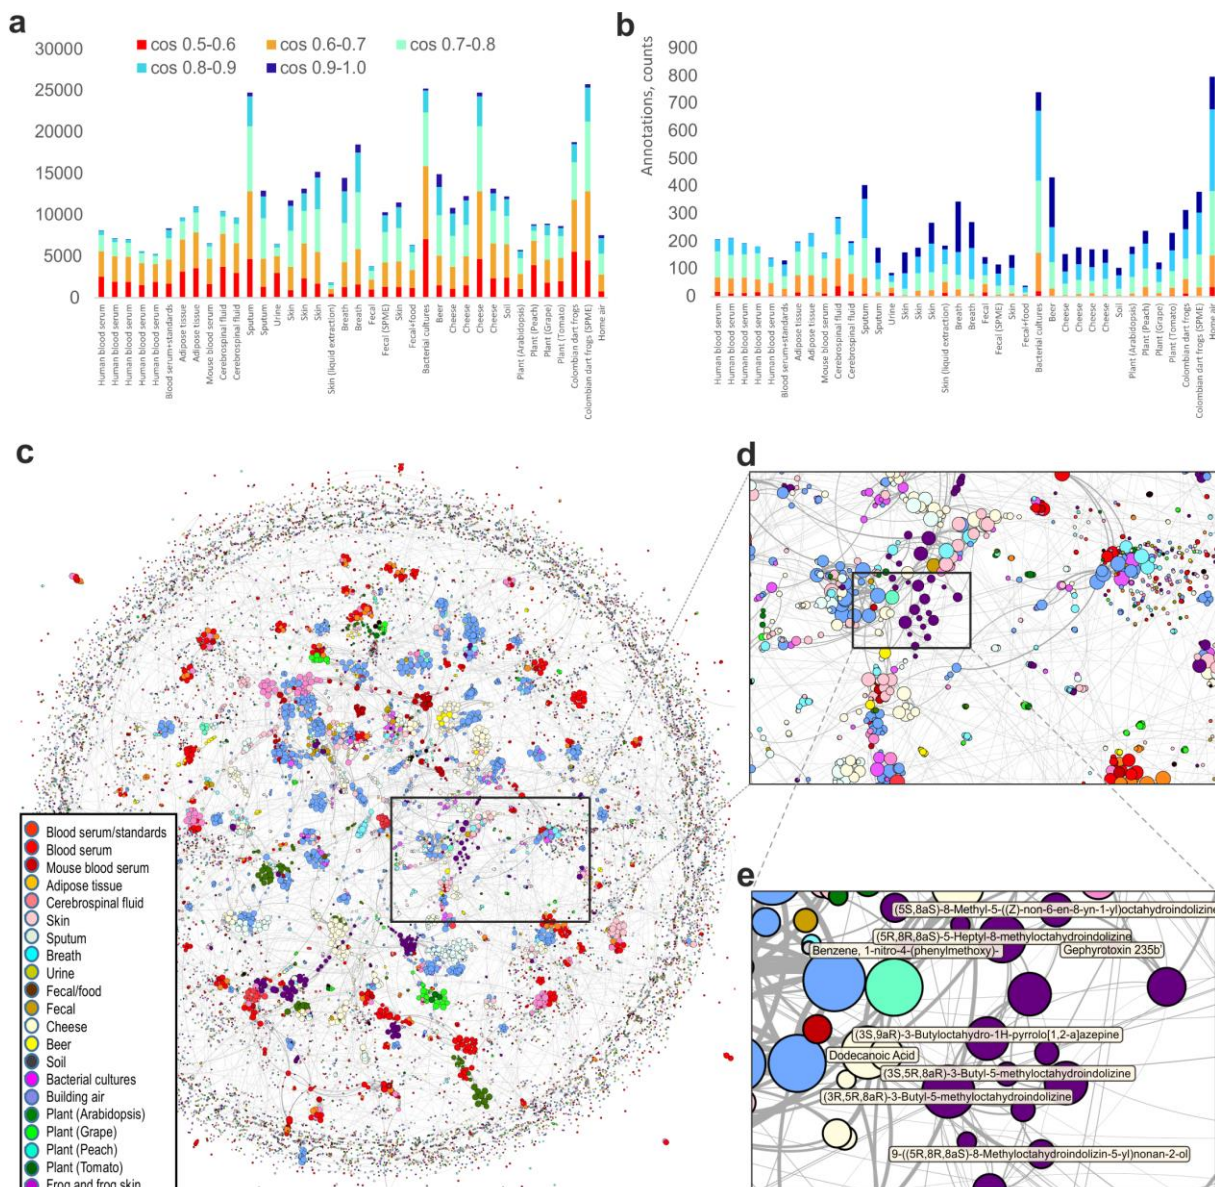

345  
 346 **Figure 3: Molecular networking of GC-MS data in GNPS.** Features that are annotated (pass library  
 347 match threshold of 0.5) are included **a)** without filtering and **b)** with a 65% balance score filtering. **c)**  
 348 Global network containing 35,544 nodes from 8,489 files in 38 GNPS datasets for different types of  
 349 samples, including human, derived from various animal, plant, microbial and environmental samples.  
 350 Nodes are connected if cosine > 0.5. The size of the node is proportional to the number of nodes that  
 351 connect to it <sup>45</sup>, the edge thickness is proportional to the cosine score (**Figure S3**), the annotation is  
 352 the top match with cosine above 0.65. **d)** The inset shows the zoomed-in portion of the network. **e)**  
 353 Close up of a cluster of compounds found in the dart frog skin samples with the top spectral library  
 354 match shown - all nodes are nitrogen heterocyclic alkaloids such as gephyrotoxin <sup>46</sup> that are unique to  
 355 these frogs.

356  
 357 The output from GNPS deconvolution, annotations, and molecular network analysis  
 358 can be exported for use in a statistical analysis environment such as Qiime <sup>47,48</sup>, Qiita <sup>49</sup>, or  
 359 MetaboAnalyst <sup>50,51</sup>, or for data visualization in tools such as Cytoscape <sup>52</sup> or Gephi <sup>53</sup> (e.g.

360 **Supplementary Figures S4-S7, Figure 3, 4e-g**), or for molecular cartography in 'ili<sup>54</sup>  
361 (**Figure 4 a-d**). To demonstrate how to use GNPS GC-MS for the latter, we collected  
362 samples from 52 body locations from one person using a sampling patch that absorbs  
363 volatiles (**Figure 4 a-d**). These samples were subjected to headspace desorption followed by  
364 GC-MS, deconvoluted and annotated using the GNPS GC-MS pipeline. The abundances  
365 from the deconvoluted spectra are superimposed onto a 3D model of a human (**Figure 4 a-**  
366 **d**). Using balance filters at 50% and >0.9 cosine, we arrived at annotations that, once  
367 visualized, revealed the distributions of skin volatiles. For example, squalene was found on  
368 all locations, but less on the feet. Hexanoic acid was most abundant on the chest and  
369 armpits. Globulol, an ingredient of the personal care product this individual used on the chest,  
370 was most intense on the chest, while phenylenedibenzoate, a skincare ingredient, was found  
371 on the face and hands.

372 We also conducted two studies (Study 1: n=631 samples and Study 2: n=219  
373 samples, respectively) on breath analysis associated with oesophageal and gastric cancers  
374 (OGC, **Figure 4 e-g**). In breath, biological signatures are usually obscured by intra- and inter-  
375 subject variability, experimental conditions, e.g. ambient air quality, different diets etc.  
376 Biologically relevant compounds are often present at low abundances. Both studies predicted  
377 OGC (inset in **Figure 4e**). The next important step is to consider features that are the most  
378 discriminant between categories of interest (OGC vs. control) to investigate whether their  
379 chemical identity can be linked to a plausible biological rationale. However, even though  
380 OGC prediction was achieved in each study, the "OGC signatures" do not appear to overlap  
381 between the two studies, which is very typical for breath analysis field in general<sup>55-58</sup>. As  
382 molecular networking organizes chemically similar compounds into clusters, it facilitates  
383 recognition of patterns at a chemical family level. Exploring the two studies as a single  
384 network revealed an increase of related but not identical medium/long chain alcohols,  
385 aldehydes and hydrocarbons (**Figure 4 e-g**). Only a handful of these compounds appeared  
386 as top discriminating features in either study. Aldehydes are known to be found  
387 endogenously, mostly due to lipid peroxidation, and have been proposed as potential  
388 biomarkers in exhaled breath in several different types of cancer including lung<sup>59-62</sup>, breast<sup>63</sup>,  
389 ovarian<sup>64</sup>, colorectal<sup>65</sup>, and, most notably, OGC<sup>66-68</sup>. The alkanes and methyl branched  
390 alkanes have not been previously associated with oesophageal or gastric cancer, but have  
391 been associated with lung and breast cancer in exhaled breath<sup>60,61,63,69,70</sup>. Lipid peroxidation  
392 of polyunsaturated fatty acids in cell membranes generates alkanes that can then be  
393 excreted in the breath<sup>71</sup>, which makes their observation in relation to OGC biologically  
394 plausible. Although few individual alkanes were found significantly increased in OGC cohort  
395 in both studies, none of them overlapped, and without considering these data as a single  
396 network, association of long-chain alkanes with OGC would be far more difficult to recognize.

397  
398  
399  
400



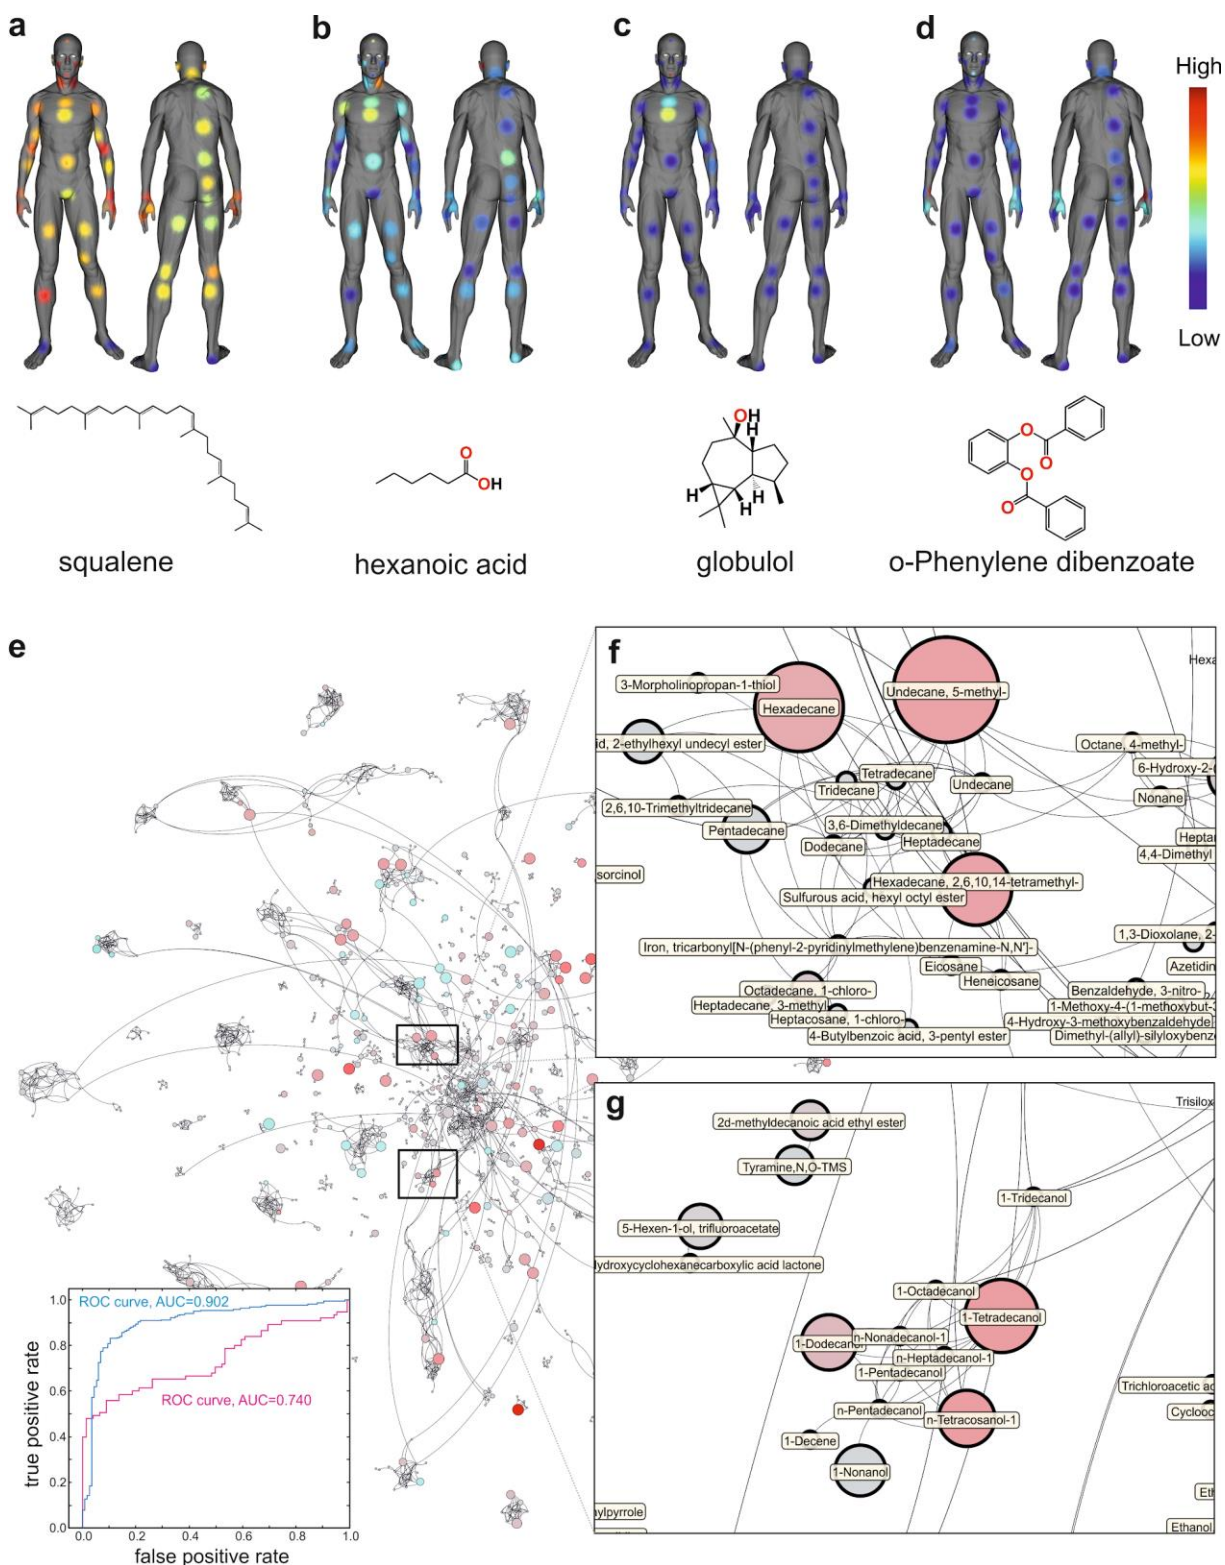

401  
402  
403  
404  
405

**Figure 4. Examples of results with GNPS processed GC-MS data.** 3D visualization of human surface volatome visualized with  $^{54}\text{Li}$  as described in the tutorial (<https://ccms-ucsd.github.io/GNPSDocumentation/gcanalysis/>). Molecular distributions on skin of a volunteer shown for: **a**) squalene, a key component of natural skin grease. Low abundance of squalene is aligned with

406 areas of dry skin <sup>72</sup> **b**) hexanoic acid, one of the malodour molecules responsible for the unpleasant  
407 sour body odor <sup>73</sup> **c**) globulol, naturally occurring in plant essential oils, likely introduced via use of skin  
408 cosmetics **d**) phenylenedibenzoate, also introduced via use of a skin product. **e**) Chemical distributions  
409 that relate to cancer status are visualized via molecular network that combines two studies. Each node  
410 represents a unique mass spectrometry feature obtained from deconvolution. The top annotation is  
411 given for matches with  $\cos > 0.65$ . The size of the node represents the importance of the feature for  
412 discrimination by the maximum margin criterion <sup>74</sup> with leave patient out cross validation of the OGC  
413 group vs control volunteers; the color of the node represents average fold-change in abundance  
414 between OGC vs. control groups (red - higher in OGC, teal - higher in control, gray - neither), the size  
415 represents  $-\log(p \text{ value})$ , larger circle corresponds to greater values. The inset shows ROC for both  
416 studies (Study 1 - blue, Study 2- red). **f**) Example of cluster of hydrocarbons and **g**) long-chain  
417 alcohols. Both human studies are approved by the institutional review boards as described in the  
418 Methods.

419

### 420 **Discussion:**

421 GNPS provides a platform for data sharing and accumulation of public knowledge.  
422 Community adoption of GNPS has sharply increased the volume of MS data in the public  
423 domain<sup>7</sup>. It has also spurred new tools development (MASST<sup>75</sup>, FBMN<sup>41</sup>, ReDU<sup>76</sup>) and  
424 enabled many biological discoveries. Due to the fundamental differences between CID and  
425 EI fragmentation, the GNPS infrastructure could not previously support the analysis of EI  
426 data. Adopting existing solutions for deconvolution was not possible as all of them required  
427 too much manual input from the user and could not operate at repository scale. Here we  
428 used an unsupervised non-negative matrix factorization and a Fast Fourier Transform-based  
429 approach to scale the deconvolution step. Such strategies are most effective when large-  
430 scale datasets become available, as features can be extracted with increasing quality of  
431 fragmentation patterns, as defined by the balance score. Currently, all 1D EI GC-MS data are  
432 amenable and we will extend the same approach to 2D GC-MS data.

433 These features can then be subjected to EI-based molecular networking. The  
434 algorithm for molecular networking within GNPS had to be modified to accommodate EI data  
435 to function without molecular ion information and can reinforce candidate annotations to level  
436 3 by assessing if the annotations are similar at the family level and if annotations share  
437 chemical class terms. Such analysis can now be achieved with the data at repository scale,  
438 enabling co- and re-analysis of GC-MS data. Here we show how the co-analysis could be  
439 beneficial for two cancer breathomics data sets, but in the same fashion other breathomics  
440 (or other volatilome) data can now be co-analyzed with these datasets as long as they are  
441 publicly available in an open file format. Co-analyzing multiple disparate GC-MS studies  
442 would be challenging otherwise. Further, when considering GC-MS data as networks, in  
443 addition to conventional statistical approaches, strategies such as networks on graphs<sup>77</sup>  
444 could be deployed to investigate global biochemical patterns rather than differences in  
445 individual compounds. The networks, in principle, are not limited to any one kind of data and  
446 can be extended to any number or type of datasets as shown in **Figure 3c**.

447 Surprisingly, although GC-MS is the oldest and most established of MS-based  
448 methods, and the sheer volume of existing EI reference data accumulated over decades (far  
449 exceeding that for any other kind of MS), researchers still use decades-old data analysis  
450 strategies. We anticipate that the new GNPS community infrastructure will incentivize moving

451 raw EI data into the public domain for data reuse, comparable to the trajectory for tandem  
452 MS<sup>7,75,76</sup>. GC-MS analysis within GNPS/MassIVE will lower the expertise threshold required  
453 for analysis, encourage FAIR practices<sup>27</sup> through reusable deposition of the data in the public  
454 domain, and promote data analysis reproducibility and “recycling” of GC-MS data. Finally,  
455 this work is a piece of the puzzle to democratize scientific analysis from all over the world.  
456 GC-MS the most widely used MS method, in part due to its competitive operational cost. It is  
457 often the only mass spectrometry method available at smaller, e.g. undergraduate  
458 institutions, non-metabolomics laboratories, or local testing facilities. The proposed  
459 infrastructure will enable labs with fewer resources, including those from developing  
460 countries, to have free access to data and reference data in a uniform format, and to free,  
461 powerful computing infrastructures.

462

### 463 **Data and code availability**

464 All of the data used in preparation of this manuscript are publicly available at the MassIVE  
465 repository at the UCSD Center for Computational Mass Spectrometry website  
466 (<https://massive.ucsd.edu>). The dataset accession numbers are: #1 (MSV000084033), #2  
467 (MSV000084033), #3 (MSV000084034), #4 (MSV000084036), #5 (MSV000084032), #6  
468 (MSV000084038), #7 (MSV000084042), #8 (MSV000084039), #9 (MSV000084040), #10  
469 (MSV000084037), #11 (MSV000084211), #12 (MSV000083598), #13 (MSV000080892), #14  
470 (MSV000080892), #15 (MSV000080892), #16 (MSV000084337), #17 (MSV000083658), #18  
471 (MSV000083743), #19 (MSV000084226), #20 (MSV000083859), #21 (MSV000083294), #22  
472 (MSV000084349), #23 (MSV000081340), #24 (MSV000084348), #25 (MSV000084378), #26  
473 (MSV000084338), #27 (MSV000084339), #28 (MSV000081161), #29 (MSV000084350), #30  
474 (MSV000084377), #31 (MSV000084145), #32 (MSV000084144), #33 (MSV000084146), #34  
475 (MSV000084379), #35 (MSV000084380), #36 (MSV000084276), #37 (MSV000084277), #38  
476 (MSV000084212).

477 All of the GNPS analysis jobs for all of the studies are summarized in **Table S1**.

478 The source code of the MSHub software is available online at Github (version used in GNPS)  
479 ([https://github.com/CCMS-UCSD/GNPS\\_Workflows/tree/master/mshub-gc/tools/mshub-gc/proc](https://github.com/CCMS-UCSD/GNPS_Workflows/tree/master/mshub-gc/tools/mshub-gc/proc))  
480 and at BitBucket (standalone version in MSHub developers’ repository:  
481 [https://bitbucket.org/iAnalytica/mshub\\_process/src/master/](https://bitbucket.org/iAnalytica/mshub_process/src/master/)). Scripts used to parse, filter,  
482 organize data and generate the plots in the manuscript are available online at Github  
483 ([https://github.com/bittremieux/GNPS\\_GC\\_fig](https://github.com/bittremieux/GNPS_GC_fig)). Script for merging individual .mgf files into a  
484 single file for creating global network is available at Github:

485 [https://github.com/bittremieux/GNPS\\_GC/blob/master/src/merge\\_mgf.py](https://github.com/bittremieux/GNPS_GC/blob/master/src/merge_mgf.py) )

486 The 3D model, feature table with coordinates used for the mapping and snapshots shown on  
487 the Figure 4a-d are available at: [https://github.com/aaksenov1/Human-volatilome-3D-](https://github.com/aaksenov1/Human-volatilome-3D-mapping-)  
488 [mapping-](https://github.com/aaksenov1/Human-volatilome-3D-mapping-)

489

490 **Methods:** These are provided as supporting information. The tools are accessible through  
491 [gnps.ucsd.edu](https://gnps.ucsd.edu) and the documentation on how to use the GNPS GC-MS Deconvolution  
492 workflow and molecular networking workflows can be found here [https://ccms-](https://ccms-ucsd.github.io/GNPSDocumentation/gcanalysis/)  
493 [ucsd.github.io/GNPSDocumentation/gcanalysis/](https://ccms-ucsd.github.io/GNPSDocumentation/gcanalysis/). Representative examples and short “how  
494 to” video can be found here:

495 <https://www.youtube.com/watch?v=yrru-5nrsk&feature=youtu.be>  
496 <https://www.youtube.com/watch?v=MblruOSgql&feature=youtu.be>  
497 [https://www.youtube.com/watch?v=iX03r\\_mGi2Q&feature=youtu.be](https://www.youtube.com/watch?v=iX03r_mGi2Q&feature=youtu.be)  
498 <https://www.youtube.com/watch?v=mv-fw2zSgss&feature=youtu.be>  
499 <https://www.youtube.com/watch?v=nUhCZ9LwoM4&feature=youtu.be>  
500 <https://www.youtube.com/watch?v=PehOiBqzzY&feature=youtu.be>

501

502 **Acknowledgments:** The conversion of the data from different repositories was supported by  
503 R03 CA211211 on reuse of metabolomics data, to build enabling chemical analysis tools for  
504 the ocean symbiosis program, the development of a user-friendly interface for GC-MS  
505 analysis was supported by the Gordon and Betty Moore Foundation through Grant  
506 GBMF7622. The UC San Diego Center for Microbiome Innovation supported the campus  
507 wide SEED grant awards for data collection that enabled the development of some of this  
508 infrastructure. PCD was supported by NSF grant IOS-1656475. KV and IL are very grateful  
509 for the support of Vodafone Foundation as part of the project DRUGS/DreamLab. AB was  
510 supported by the National Institute of Justice Award 2015-DN-BX-K047. Additional support  
511 for data acquisition and data storage was provided by P41 GM103484 Center for  
512 Computational Mass Spectrometry, the collection of data from the HomeChem project was  
513 supported by the Sloan Foundation. GBH, SD, IL, KV and IB are grateful for the support of  
514 the OG cancer breath analysis study by the NIHR London Invitro Diagnostic Co-operative  
515 and Imperial Biomedical Research Centre, Rosetrees and Stonegate Trusts and Imperial  
516 College Charity. IB acknowledges the contribution of Qing Wen and Dr Michelangelo Colavita  
517 for the production of the training video. CC was supported by the Research Foundation  
518 Flanders (FWO), with support from the industrial research fund of Ghent University. WB was  
519 supported by the Research Foundation Flanders (FWO). AAO acknowledges the support of  
520 Fulbright Commission and Consejo Nacional de Investigaciones Científicas y Técnicas  
521 (CONICET-Argentina). The work of RL and PLB on the dataset 30 was supported by the  
522 Metaboscope, part of the "Platform 3A" funded by the European Regional Development  
523 Fund, the French Ministry of Research, Higher Education and Innovation, the region  
524 Provence-Alpes-Côte d'Azur, the Departmental Council of Vaucluse and the Urban  
525 Community of Avignon. SA and ARF acknowledge the PlantaSYST project by the European  
526 Unions Horizon 2020 research and innovation programme (SGA-CSA No 664621 and No  
527 739582 under FPA No. 664620). VV acknowledges the support by the National Institute On  
528 Alcohol Abuse and Alcoholism award R24AA022057. MG and RC acknowledge the support  
529 of the Krupp Endowed Fund grant. A portion of mass spectra in the public reference library  
530 was produced within the framework of the State Task for the Topchiev Institute of  
531 Petrochemical Synthesis RAS and with the support of the RUDN University Program 5-100.  
532 RSB acknowledges support of the State Task for the Topchiev Institute of Petrochemical  
533 Synthesis RAS. LNK acknowledges support of the RUDN University Program 5-100. IM  
534 acknowledges support of the Israel Science Foundation project number 1947/19 and  
535 European Research Council under the European Union's Horizon 2020 research and  
536 innovation program (project number 640384). JS has been supported by NIH/NIAMS  
537 R03AR072182, The Colton Center for Autoimmunity, Rheumatology Research Foundation,  
538 The Riley Family Foundation and The Snyder Family Foundation. JM acknowledges support



539 from 2017 Group for Research and Assessment of Psoriasis and Psoriatic Arthritis  
540 (GRAPPA) Pilot Research Grant and NIH/NIAMS T32AR069515. RG is grateful to the Azrieli  
541 Foundation for the award of an Azrieli Fellowship. JJJvdH acknowledges support from an  
542 ASDI eScience grant, ASDI.2017.030, from the Netherlands eScience Center-NLeSC. BA  
543 was supported by the National Science Foundation (NSF) through the Graduate Research  
544 Fellowship Program. GC-MS analyses for collection of the dataset MSV000083743 were  
545 supported by the Pacific Northwest National Laboratory, Laboratory Directed Research and  
546 Development Program, and were contributed by the Microbiomes in Transition Initiative; data  
547 were collected in the Environmental Molecular Sciences Laboratory, a national scientific user  
548 facility sponsored by the Department of Energy (DOE) Office of Biological and Environmental  
549 Research and located at Pacific Northwest National Laboratory (PNNL). PNNL is operated by  
550 Battelle Memorial Institute for the DOE under contract DEAC05-76RLO1830. Authors are  
551 grateful to Drs. Marina Vance and Delphine Farmer who have organized the sampling for  
552 HomeChem indoor chemistry project (<https://indoorchem.org/projects/homechem/>) that  
553 allowed to collect samples for the dataset MSV000083598. Brandon Ross has assisted with  
554 collecting data for the dataset MSV000084348. GC-MS analyses for collection of the  
555 datasets MSV000084211 and MSV000084212 were supported by the announcement N757  
556 Doctorados Nacionales and project EXT-2016-69-1713 from Departamento Administrativo de  
557 Ciencia, Tecnología e Innovación (COLCIENCIAS), the seed project INV-2019-67-1747 and  
558 FAPA project of Chiara Carazzone from the Faculty of Science at Universidad de los Andes,  
559 and the grant No. FP80740-064-2016 of COLCIENCIAS. Authors are grateful to Lida M.  
560 Garzón, Pablo Palacios, Marco Gonzalez and Jack Hernandez for their contributions  
561 collecting the samples, and to Jhony Oswaldo Turizo for designing and manufacturing the  
562 amphibian electrical stimulator.

563

564

565

566

567

568

569 **References**

570

571

- 572 1. Pizzoferrato, L., Nicoli, S. & Lintas, C. GC-MS characterization and quantification of  
573 sterols and cholesterol oxidation products. *Chromatographia* vol. 35 269–274 (1993).
- 574 2. Coldwell, R. D., Porteous, C. E., Trafford, D. J. H. & Makin, H. L. J. Gas  
575 chromatography—mass spectrometry and the measurement of vitamin D metabolites in  
576 human serum or plasma. *Steroids* vol. 49 155–196 (1987).
- 577 3. Mr, J., Johnston, M. R. & Sobhi, H. F. Advances in Fatty Acid Analysis for Clinical  
578 Investigation and Diagnosis using GC/MS Methodology. *Journal of Biochemistry and*  
579 *Analytical studies* vol. 3 (2018).
- 580 4. Du, X. & Zeisel, S. H. Spectral deconvolution for gas chromatography mass  
581 spectrometry-based metabolomics: current status and future perspectives. *Comput.*  
582 *Struct. Biotechnol. J.* **4**, e201301013 (2013).
- 583 5. Stein, S. E. An integrated method for spectrum extraction and compound identification  
584 from gas chromatography/mass spectrometry data. *Journal of the American Society for*  
585 *Mass Spectrometry* vol. 10 770–781 (1999).
- 586 6. Stein, S. Mass Spectral Reference Libraries: An Ever-Expanding Resource for Chemical  
587 Identification. *Analytical Chemistry* vol. 84 7274–7282 (2012).
- 588 7. Aksenov, A. A., da Silva, R., Knight, R., Lopes, N. P. & Dorrestein, P. C. Global chemical  
589 analysis of biology by mass spectrometry. *Nature Reviews Chemistry* vol. 1 (2017).
- 590 8. Smirnov, A. *et al.* ADAP-GC 4.0: Application of Clustering-Assisted Multivariate Curve  
591 Resolution to Spectral Deconvolution of Gas Chromatography–Mass Spectrometry  
592 Metabolomics Data. *Analytical Chemistry* vol. 91 9069–9077 (2019).
- 593 9. Tsugawa, H. *et al.* MS-DIAL: data-independent MS/MS deconvolution for comprehensive  
594 metabolome analysis. *Nat. Methods* **12**, 523–526 (2015).

- 595 10. Lommen, A. & Kools, H. J. MetAlign 3.0: performance enhancement by efficient use of  
596 advances in computer hardware. *Metabolomics* **8**, 719–726 (2012).
- 597 11. Styczynski, M. P. *et al.* Systematic identification of conserved metabolites in GC/MS data  
598 for metabolomics and biomarker discovery. *Anal. Chem.* **79**, 966–973 (2007).
- 599 12. Amigo, J. M., Skov, T., Bro, R., Coello, J. & MasPOCH, S. Solving GC-MS problems with  
600 PARAFAC2. *TrAC Trends in Analytical Chemistry* vol. 27 714–725 (2008).
- 601 13. Kessler, N. *et al.* MeltDB 2.0—advances of the metabolomics software system.  
602 *Bioinformatics* **29**, 2452–2459 (2013).
- 603 14. Domingo-Almenara, X. *et al.* eRah: A Computational Tool Integrating Spectral  
604 Deconvolution and Alignment with Quantification and Identification of Metabolites in  
605 GC/MS-Based Metabolomics. *Analytical Chemistry* vol. 88 9821–9829 (2016).
- 606 15. Skogerson, K., Wohlgemuth, G., Barupal, D. K. & Fiehn, O. The volatile compound  
607 BinBase mass spectral database. *BMC Bioinformatics* **12**, 321 (2011).
- 608 16. Akiyama, K. *et al.* PRIME: a Web site that assembles tools for metabolomics and  
609 transcriptomics. *In Silico Biol.* **8**, 339–345 (2008).
- 610 17. Horai, H. *et al.* MassBank: a public repository for sharing mass spectral data for life  
611 sciences. *J. Mass Spectrom.* **45**, 703–714 (2010).
- 612 18. Sud, M. *et al.* Metabolomics Workbench: An international repository for metabolomics  
613 data and metadata, metabolite standards, protocols, tutorials and training, and analysis  
614 tools. *Nucleic Acids Res.* **44**, D463–70 (2016).
- 615 19. Carroll, A. J., Badger, M. R. & Harvey Millar, A. The MetabolomeExpress Project:  
616 enabling web-based processing, analysis and transparent dissemination of GC/MS  
617 metabolomics datasets. *BMC Bioinformatics* **11**, 376 (2010).
- 618 20. Haug, K. *et al.* MetaboLights—an open-access general-purpose repository for  
619 metabolomics studies and associated meta-data. *Nucleic Acids Research* vol. 41 D781–  
620 D786 (2013).

- 621 21. Hummel, J. *et al.* Mass Spectral Search and Analysis Using the Golm Metabolome  
622 Database. *The Handbook of Plant Metabolomics* 321–343 (2013)  
623 doi:10.1002/9783527669882.ch18.
- 624 22. Kim, S., Gupta, N., Bandeira, N. & Pevzner, P. A. Spectral dictionaries: Integrating de  
625 novo peptide sequencing with database search of tandem mass spectra. *Mol. Cell.*  
626 *Proteomics* **8**, 53–69 (2009).
- 627 23. Guthals, A., Watrous, J. D., Dorrestein, P. C. & Bandeira, N. The spectral networks  
628 paradigm in high throughput mass spectrometry. *Mol. Biosyst.* **8**, 2535–2544 (2012).
- 629 24. Watrous, J. *et al.* Mass spectral molecular networking of living microbial colonies. *Proc.*  
630 *Natl. Acad. Sci. U. S. A.* **109**, E1743–52 (2012).
- 631 25. Varmuza, K., Karlovits, M. & Demuth, W. Spectral similarity versus structural similarity:  
632 infrared spectroscopy. *Analytica Chimica Acta* vol. 490 313–324 (2003).
- 633 26. Elie, N., Santerre, C. & Touboul, D. Generation of a Molecular Network from Electron  
634 Ionization Mass Spectrometry Data by Combining MZmine2 and MetGem Software.  
635 *Anal. Chem.* **91**, 11489–11492 (2019).
- 636 27. Wilkinson, M. D. *et al.* The FAIR Guiding Principles for scientific data management and  
637 stewardship. *Sci Data* **3**, 160018 (2016).
- 638 28. Tautenhahn, R., Patti, G. J., Rinehart, D. & Siuzdak, G. XCMS Online: A Web-Based  
639 Platform to Process Untargeted Metabolomic Data. *Analytical Chemistry* vol. 84 5035–  
640 5039 (2012).
- 641 29. Wang, M. *et al.* Sharing and community curation of mass spectrometry data with Global  
642 Natural Products Social Molecular Networking. *Nat. Biotechnol.* **34**, 828–837 (2016).
- 643 30. Pluskal, T., Castillo, S., Villar-Briones, A. & Orešič, M. MZmine 2: Modular framework for  
644 processing, visualizing, and analyzing mass spectrometry-based molecular profile data.  
645 *BMC Bioinformatics* vol. 11 (2010).
- 646 31. Wenig, P. & Odermatt, J. OpenChrom: a cross-platform open source software for the



- 647 mass spectrometric analysis of chromatographic data. *BMC Bioinformatics* **11**, 405  
648 (2010).
- 649 32. Tautenhahn, R., Böttcher, C. & Neumann, S. Highly sensitive feature detection for high  
650 resolution LC/MS. *BMC Bioinformatics* **9**, 504 (2008).
- 651 33. He, Q. P., Wang, J., Mobley, J. A., Richman, J. & Grizzle, W. E. Self-calibrated warping  
652 for mass spectra alignment. *Cancer Inform.* **10**, 65–82 (2011).
- 653 34. Qiu, F., Lei, Z. & Sumner, L. W. MetExpert: An expert system to enhance gas  
654 chromatography–mass spectrometry-based metabolite identifications. *Anal. Chim. Acta*  
655 **1037**, 316–326 (2018).
- 656 35. Djoumbou Feunang, Y. *et al.* ClassyFire: automated chemical classification with a  
657 comprehensive, computable taxonomy. *J. Cheminform.* **8**, 61 (2016).
- 658 36. AIST:Spectral Database for Organic Compounds,SDBS.  
659 <https://sdfs.db.aist.go.jp/sdfs/cgi-bin/ENTRANCE.cgi>.
- 660 37. Kind, T. *et al.* FiehnLib: mass spectral and retention index libraries for metabolomics  
661 based on quadrupole and time-of-flight gas chromatography/mass spectrometry. *Anal.*  
662 *Chem.* **81**, 10038–10048 (2009).
- 663 38. Wishart, D. S. *et al.* HMDB 4.0: the human metabolome database for 2018. *Nucleic*  
664 *Acids Res.* **46**, D608–D617 (2018).
- 665 39. Remoroza, C. A., Mak, T. D., De Leoz, M. L. A., Mirokhin, Y. A. & Stein, S. E. Creating a  
666 Mass Spectral Reference Library for Oligosaccharides in Human Milk. *Analytical*  
667 *Chemistry* vol. 90 8977–8988 (2018).
- 668 40. Sumner, L. W. *et al.* Proposed minimum reporting standards for chemical analysis.  
669 *Metabolomics* vol. 3 211–221 (2007).
- 670 41. Nothias, L. F. *et al.* Feature-based Molecular Networking in the GNPS Analysis  
671 Environment. *Bioinformatics* **143** (2019).
- 672 42. Stauffer, D. B., McLafferty, F. W., Ellis, R. D. & Peterson, D. W. Probability-based-

- 673 matching algorithm with forward searching capabilities for matching unknown mass  
674 spectra of mixtures. *Analytical Chemistry* vol. 57 1056–1060 (1985).
- 675 43. Stauffer, D. B., McLafferty, F. W., Ellis, R. D. & Peterson, D. W. Adding forward  
676 searching capabilities to a reverse search algorithm for unknown mass spectra.  
677 *Analytical Chemistry* vol. 57 771–773 (1985).
- 678 44. Ernst, M. *et al.* MolNetEnhancer: enhanced molecular networks by integrating  
679 metabolome mining and annotation tools. *bioRxiv* 654459 (2019) doi:10.1101/654459.
- 680 45. Brin, S. & Page, L. The anatomy of a large-scale hypertextual Web search engine.  
681 *Computer Networks and ISDN Systems* vol. 30 107–117 (1998).
- 682 46. Daly, J. W., Witkop, B., Tokuyama, T., Nishikawa, T. & Karle, I. L. Gephyrotoxins,  
683 histrionicotoxins and pumiliotoxins from the neotropical frog *Dendrobates histrionicus*.  
684 *Helv. Chim. Acta* **60**, 1128–1140 (1977).
- 685 47. Caporaso, J. G. *et al.* QIIME allows analysis of high-throughput community sequencing  
686 data. *Nat. Methods* **7**, 335–336 (2010).
- 687 48. Bolyen, E. *et al.* Author Correction: Reproducible, interactive, scalable and extensible  
688 microbiome data science using QIIME 2. *Nat. Biotechnol.* **37**, 1091 (2019).
- 689 49. Gonzalez, A. *et al.* Qiita: rapid, web-enabled microbiome meta-analysis. *Nat. Methods*  
690 **15**, 796–798 (2018).
- 691 50. Chong, J., Wishart, D. S. & Xia, J. Using MetaboAnalyst 4.0 for Comprehensive and  
692 Integrative Metabolomics Data Analysis. *Current Protocols in Bioinformatics* vol. 68  
693 (2019).
- 694 51. Xia, J. & Wishart, D. S. Metabolomic Data Processing, Analysis, and Interpretation Using  
695 MetaboAnalyst. *Current Protocols in Bioinformatics* vol. 34 14.10.1–14.10.48 (2011).
- 696 52. Shannon, P. *et al.* Cytoscape: a software environment for integrated models of  
697 biomolecular interaction networks. *Genome Res.* **13**, 2498–2504 (2003).
- 698 53. Jacomy, M., Venturini, T., Heymann, S. & Bastian, M. ForceAtlas2, a Continuous Graph

- 699           Layout Algorithm for Handy Network Visualization Designed for the Gephi Software.  
700           *PLoS ONE* vol. 9 e98679 (2014).
- 701   54. Protsyuk, I. *et al.* 3D molecular cartography using LC-MS facilitated by Optimus and 'ili  
702           software. *Nat. Protoc.* **13**, 134–154 (2018).
- 703   55. Einoch Amor, R., Nakhleh, M. K., Barash, O. & Haick, H. Breath analysis of cancer in the  
704           present and the future. *Eur. Respir. Rev.* **28**, (2019).
- 705   56. Schmidt, K. & Podmore, I. Current Challenges in Volatile Organic Compounds Analysis  
706           as Potential Biomarkers of Cancer. *J Biomark* **2015**, 981458 (2015).
- 707   57. Lawal, O., Ahmed, W. M., Nijsen, T. M. E., Goodacre, R. & Fowler, S. J. Exhaled breath  
708           analysis: a review of 'breath-taking' methods for off-line analysis. *Metabolomics* **13**, 110  
709           (2017).
- 710   58. Alkhalifah, Y. *et al.* VOCCluster: Untargeted Metabolomics Feature Clustering Approach  
711           for Clinical Breath Gas Chromatography - Mass Spectrometry Data. *Anal. Chem.* (2019)  
712           doi:10.1021/acs.analchem.9b03084.
- 713   59. Poli, D. *et al.* Determination of aldehydes in exhaled breath of patients with lung cancer  
714           by means of on-fiber-derivatisation SPME–GC/MS. *Journal of Chromatography B* vol.  
715           878 2643–2651 (2010).
- 716   60. Phillips, M. *et al.* Volatile organic compounds in breath as markers of lung cancer: a  
717           cross-sectional study. *The Lancet* vol. 353 1930–1933 (1999).
- 718   61. Phillips, M. *et al.* Detection of lung cancer with volatile markers in the breath. *Chest* **123**,  
719           2115–2123 (2003).
- 720   62. Fuchs, P., Loeseken, C., Schubert, J. K. & Miekisch, W. Breath gas aldehydes as  
721           biomarkers of lung cancer. *International Journal of Cancer* NA–NA (2009)  
722           doi:10.1002/ijc.24970.
- 723   63. Phillips, M. *et al.* Prediction of breast cancer using volatile biomarkers in the breath.  
724           *Breast Cancer Research and Treatment* vol. 99 19–21 (2006).

- 725 64. Amal, H. *et al.* Assessment of ovarian cancer conditions from exhaled breath.  
726 *International Journal of Cancer* vol. 136 E614–E622 (2015).
- 727 65. Altomare, D. F. *et al.* Exhaled volatile organic compounds identify patients with colorectal  
728 cancer. *British Journal of Surgery* vol. 100 144–150 (2013).
- 729 66. Markar, S. R. *et al.* Assessment of a Noninvasive Exhaled Breath Test for the Diagnosis  
730 of Oesophagogastric Cancer. *JAMA Oncology* vol. 4 970 (2018).
- 731 67. Amal, H. *et al.* Detection of precancerous gastric lesions and gastric cancer through  
732 exhaled breath. *Gut* **65**, 400–407 (2016).
- 733 68. Kumar, S. *et al.* Mass Spectrometric Analysis of Exhaled Breath for the Identification of  
734 Volatile Organic Compound Biomarkers in Esophageal and Gastric Adenocarcinoma.  
735 *Ann. Surg.* **262**, 981–990 (2015).
- 736 69. Sihvo, E. I. T. *et al.* Oxidative stress has a role in malignant transformation in Barrett's  
737 oesophagus. *International Journal of Cancer* vol. 102 551–555 (2002).
- 738 70. Phillips, M., Greenberg, J. & Sabas, M. Alveolar gradient of pentane in normal human  
739 breath. *Free Radic. Res.* **20**, 333–337 (1994).
- 740 71. Risby, T. H. & Sehnert, S. S. Clinical application of breath biomarkers of oxidative stress  
741 status. *Free Radical Biology and Medicine* vol. 27 1182–1192 (1999).
- 742 72. Pappas, A. Epidermal surface lipids. *Dermatoendocrinol.* **1**, 72–76 (2009).
- 743 73. Martin, A. *et al.* A functional ABCC11 allele is essential in the biochemical formation of  
744 human axillary odor. *J. Invest. Dermatol.* **130**, 529–540 (2010).
- 745 74. Li, H., Jiang, T. & Zhang, K. Efficient and robust feature extraction by maximum margin  
746 criterion. *IEEE Trans. Neural Netw.* **17**, 157–165 (2006).
- 747 75. Wang, M. *et al.* MASST: A Web-based Basic Mass Spectrometry Search Tool for  
748 Molecules to Search Public Data. doi:10.1101/591016.
- 749 76. Jarmusch, A. K. *et al.* Repository-scale Co- and Re-analysis of Tandem Mass  
750 Spectrometry Data. *bioRxiv* 750471 (2019) doi:10.1101/750471.



751 77. Masci, J., Rodolà, E., Boscaini, D., Bronstein, M. M. & Li, H. Geometric deep learning.

752 *SIGGRAPH ASIA 2016 Courses on - SA '16* (2016) doi:10.1145/2988458.2988485.

753
